# Supplementary material for: Benzyltrimethylammonium cadmium dicyanamide with polar order in multiple phases and prospects for linear and nonlinear optical temperature sensing
Source: Royal Society of Chemistry journal article supplement (doi:10.1039/d1dt01675j), 2021-01-01
Supplement: d1dt01675j1.pdf [file d1dt01675j1.pdf]

# **Benzyltrimethylammonium cadmium dicyanamide with polar order in multiple phases and prospects for linear and nonlinear optical temperature sensing**

Mirosław Mączka,<sup>\*,a</sup> Anna Gągor,<sup>a</sup> Jan. K. Zaręba,<sup>b</sup> Monika Trzebiatowska,<sup>a</sup> Dagmara Stefańska,<sup>a</sup> Edyta Kucharska,<sup>c</sup> Jerzy Hanuza<sup>a</sup>, Norbert Pałka,<sup>d</sup> Elżbieta Czerwińska<sup>d</sup> and Adam Sieradzki<sup>e</sup>

<sup>a</sup>*Institute of Low Temperature and Structure Research, Polish Academy of Sciences, Okólna 2, 50-422 Wrocław, Poland*

<sup>b</sup>*Advanced Materials Engineering and Modeling Group, Wrocław University of Science and Technology, Wybrzeże Wyspiańskiego 27, 50-370, Wrocław, Poland*

<sup>c</sup>*Department of Bioorganic Chemistry, Faculty of Production Engineering, University of Economics and Business, 118/120 Komandorska str., 53-345 Wrocław, Poland*

<sup>d</sup>*Institute of Optoelectronics, Military University of Technology, S. Kaliskiego 2, 00-908 Warsaw, Poland*

<sup>e</sup>*Department of Experimental Physics, Wrocław University of Science and Technology, Wybrzeże Wyspiańskiego 27, 50-370, Wrocław, Poland*

Table S1. Comparison of the thermometric performance of representative compounds from CPs, QDs (quantum dots), NPs (nanoparticles), and P (microparticles);  $S_m$  denotes the highest relative sensitivity at the temperature  $T_m$ .

| Compound                                                                                                                                            | T range (K)            | $S_m$ (%K <sup>-1</sup> ) | $T_m$ (K) | Ref.      |
|-----------------------------------------------------------------------------------------------------------------------------------------------------|------------------------|---------------------------|-----------|-----------|
| BeTriMeCd                                                                                                                                           | 80 – 350 <sup>a</sup>  | 2.59                      | 90        | This work |
|                                                                                                                                                     | 211 – 267 <sup>b</sup> | 0.34                      | 239       |           |
|                                                                                                                                                     | 269 – 380 <sup>b</sup> | 0.44                      | 324       |           |
| Eu <sub>0.0069</sub> Tb <sub>0.9931</sub> -DMBDC                                                                                                    | 50 - 200               | 1.15                      | 200       | 1         |
| [(Tb <sub>0.914</sub> Eu <sub>0.086</sub> ) <sub>2</sub> (PDA) <sub>3</sub> (H <sub>2</sub> O)]·2H <sub>2</sub> O                                   | 10 - 325               | 5.96                      | 25        | 2         |
| Tb <sub>0.99</sub> Eu <sub>0.01</sub> (BDC) <sub>1.5</sub> (H <sub>2</sub> O) <sub>2</sub>                                                          | 290 - 320              | 0.31                      | 318       | 3         |
| Gd <sub>0.7638</sub> Tb <sub>0.2188</sub> Eu <sub>0.0174</sub> (phen)(1,3,5-btc)(DMF)·DMF                                                           | 293 - 393              | 2.71 <sup>c</sup>         | All range | 4         |
|                                                                                                                                                     |                        | 2.91 <sup>d</sup>         |           |           |
| Tb <sub>0.8</sub> Eu <sub>0.2</sub> (bpda)                                                                                                          | 293 - 328              | 1.19                      | 313       | 5         |
| [Me <sub>2</sub> NH <sub>2</sub> ][Eu <sub>0.0066</sub> Tb <sub>0.9934</sub> (ddcpp)(H <sub>2</sub> O) <sub>2</sub> ]                               | 77 - 450               | 3.76                      | 450       | 6         |
| (Me <sub>2</sub> NH <sub>2</sub> ) <sub>3</sub> [Eu <sub>3</sub> (FDC) <sub>4</sub> (NO <sub>3</sub> ) <sub>4</sub> ] <sub>4</sub> H <sub>2</sub> O | 12 - 320               | 2.70                      | 170       | 7         |
| Sr(HCOO) <sub>2</sub> :Eu <sup>2+</sup> /Eu <sup>3+</sup>                                                                                           | 9 - 293                | 3.80                      | 293       | 8         |
| Tb <sub>0.995</sub> Eu <sub>0.005</sub> @In(OH)(bpydc)                                                                                              | 283-333                | 4.97                      | -         | 9         |
| Tb <sub>0.8</sub> Eu <sub>0.2</sub> (bpda)                                                                                                          | 298-318                | 1.19                      | 313       | 10        |
| [Me <sub>2</sub> NH <sub>2</sub> ][Eu <sub>0.0066</sub> Tb <sub>0.9934</sub> (ddcpp)(H <sub>2</sub> O) <sub>2</sub> ]                               | 77-450                 | 3.76                      | 450       | 11        |
| Tb <sub>0.95</sub> Eu <sub>0.05</sub> HL                                                                                                            | 4-50                   | 31                        | 4         | 12        |
| [Eu <sub>0.102</sub> Tb <sub>0.898</sub> (notpH <sub>4</sub> )(NO <sub>3</sub> )(H <sub>2</sub> O)] <sub>8</sub> H <sub>2</sub> O                   | 18 - 300               | 3.90                      | 38        | 13        |
| Tb <sub>0.957</sub> Eu <sub>0.043</sub> cpda                                                                                                        | 40 - 300               | 1.77                      | 250       | 14        |
| Tb <sub>0.9</sub> Eu <sub>0.1</sub> (PIA)(HPIA)(H <sub>2</sub> O) <sub>2.5</sub>                                                                    | 100 - 300              | 3.26                      | 300       | 15        |
| Tb <sub>0.99</sub> Eu <sub>0.01</sub> (bdc) <sub>1.5</sub> ·(H <sub>2</sub> O) <sub>2</sub>                                                         | 290 - 320              | 0.30                      | 310       | 16        |
| [Tb(H <sub>5</sub> btp)]·2H <sub>2</sub> O                                                                                                          | 299 - 319              | 1.43                      | 310       | 17        |

CPs

|                                                                                        |     |           |       |     |    |
|----------------------------------------------------------------------------------------|-----|-----------|-------|-----|----|
| CdSe                                                                                   |     | 82 - 280  | 0.69  | 200 | 18 |
| CdTe                                                                                   | QDs | 80 - 360  | 0.7   | 199 | 19 |
| CdSe/ZnS                                                                               |     | 278 - 313 | 0.025 | 313 | 20 |
| Zn <sub>1-x</sub> Mn <sub>x</sub> Se/ZnCdSe                                            |     | 134 - 400 | 0.07  | 134 | 21 |
| SrF <sub>2</sub> :Yb, Er                                                               | NPs | 298 - 383 | 1.21  | 298 | 22 |
| (Gd <sub>0.98</sub> Nd <sub>0.2</sub> ) <sub>2</sub> O <sub>3</sub>                    |     | 298 - 338 | 2.18  | 298 | 23 |
| YVO <sub>4</sub> :Nd <sup>3+</sup>                                                     |     | 123 - 873 | 1.50  | 283 | 24 |
| NaYF <sub>4</sub> :Nd <sup>3+</sup>                                                    |     | 273 - 423 | 0.12  | 273 | 25 |
| Ba <sub>2</sub> MgWO <sub>6</sub> :Eu <sup>3+</sup>                                    | P   | 80 - 375  | 1.5   | 120 | 26 |
| Sr <sub>2</sub> (Ge, Si)O <sub>4</sub> : Pr <sup>3+</sup>                              |     | 20 - 700  | 2.94  | 225 | 27 |
| Ca <sub>2</sub> Mg <sub>0.5</sub> AlSi <sub>1.5</sub> O <sub>7</sub> :Eu <sup>2+</sup> |     | 80 - 575  | 1.62  | 350 | 28 |
| La <sub>0.4</sub> Gd <sub>1.6</sub> Zr <sub>2</sub> O <sub>7</sub> :Pr <sup>3+</sup>   |     | 15 - 650  | 0.81  | 650 | 29 |
| Mg <sub>2</sub> Al <sub>4</sub> Si <sub>5</sub> O <sub>18</sub> :Eu <sup>2+</sup>      |     | 25 - 425  | 0.45  | 400 | 30 |

a – luminescence thermometry under linear excitation (266 nm)

b – SHG single band thermometry (800 nm pumping)

c – one-photon excitation at 377 nm,

d – three-photon excitation at 800 nm

1. Y. Cui, H. Xu, Y. Yue, Z. Guo, J. Yu, Z. Chen, J. Gao, Y. Yang, G. Qian and B. Chen, *J. Am. Chem. Soc.*, 2012, **134**, 3979–3982.
2. Z. Wang, D. Ananias, A. Carné-Sánchez, C. D. S. Brites, I. Imaz, D. MasPOCH, J. Rocha and L. D. Carlos, *Adv. Funct. Mater.*, 2015, **25**, 2824–2830.
3. A. Cadiou, C. D. S. Brites, P. M. F. J. Costa, R. A. S. Ferreira, J. Rocha and L. D. Carlos, *ACS Nano*, 2013, **7**, 7213–7218.
4. J. K. Zaręba, M. Nyk, J. Janczak, and M. Samoć, *ACS Appl. Mater. Interfaces* 2019, **11**, 10435–10441.
5. D. Zhao, X. Rao, J. Yu, Y. Cui, Y. Yang and G. Qian, *Inorg. Chem.*, 2015, **54**, 11193–11199.
6. Y. Yang, L. Chen, F. Jiang, M. Yu, X. Wan, B. Zhang and M. Hong, *J. Mat. Chem. C*, 2017, **5**, 1981–1989.
7. L. Li, Y. Zhu, X. Zhou, C. D. S. Brites, D. Ananias, Z. Lin, F. A. A. Paz, J. Rocha, W. Huang and L. D. Carlos, *Adv. Funct. Mater.*, 2016, **26**, 8677–8684.
8. W. Liu, L. Liu, Y. Wang, L. Chen, J. A. McLeod, L. Yang, J. Zhao, Z. Liu, J. Diwu, Z. Chai, T. E. Albrecht-Schmitt, G. Liu and S. Wang, *Chem. - A Eur. J.*, 2016, **22**, 11170–11175.
9. Y. Zhou, B. Yan and F. Lei, *Chem. Commun.*, 2014, **50**, 15235–15238.
10. D. Zhao, X. Rao, J. Yu, Y. Cui, Y. Yang and G. Qian, *Inorg. Chem.*, 2015, **54**, 11193–11199.
11. Y. Yang, L. Chen, F. Jiang, M. Yu, X. Wan, B. Zhang and M. Hong, *J. Mater. Chem. C*, 2017, **5**, 1981–1989.
12. X. Liu, S. Akerboom, M. De Jong, I. Mutikainen, S. Tanase, A. Meijerink and E. Bouwman, *Inorg. Chem.*, 2015, **54**, 11323–11329.
13. M. Ren, C. D. S. Brites, S.-S. Bao, Rute A. S. Ferreira, L.-M. Zheng and L. D. Carlos *J. Mater. Chem. C*, 2015, **3**, 8480–8484.
14. Y. J. Cui, W. F. Zou, R. J. Song, J. C. Yu, W. Q. Zhang, Y. Yang and G. D. Qian, *Chem. Commun.*, 2014, **50**,

- 719.
15. X. Rao, T. Song, J. Gao, Y. Cui, Y. Yang, C. Wu, B. Chen and G. Qian, *J. Am. Chem. Soc.*, 2013, **135**, 15559–15564.
  16. A. Cadiou, C. D. S. Brites, P. Costa, R. A. S. Ferreira, J. Rocha, L. D. Carlos, Ratiometric Nanothermometer Based on an Emissive Ln<sup>3+</sup>-Organic Framework *ACS Nano* 2013, **7**, 7213–7218
  17. D. Ananias, A. D. G. Firmino, R. F. Mendes, F. A. A. Paz, M. Nolasco, L. D. Carlos, and J. Rocha, *Chem. Mater.*, 2017, **29**, 9547–9554.
  18. L. Jethi, M. M. Krause and P. Kambhampati, *J. Phys. Chem. Lett.*, 2015, **6**, 718–721.
  19. S. Kalytchuk, O. Zhovtiuk, S. V. Kershaw, R. Zbořil and A. L. Rogach, *Small*, 2016, **12**, 466–476.
  20. G. W. Walker, V. C. Sundar, C. M. Rudzinski, A. W. Wun, M. G. Bawendi and D. G. Nocera, *Appl. Phys. Lett.*, 2003, **83**, 3555–3557.
  21. V. A. Vlaskin, N. Janssen, J. Van Rijssel, R. Beaulac and D. R. Gamelin, *Nano Lett.*, 2010, **10**, 3670–3674.
  22. S. Balabhadra, M. L. Debasu, C. D. S. Brites, R. A. S. Ferreira and L. D. Carlos, *J. Phys. Chem. C*, 2017, **121**, 13962–13968.
  23. M. L. Debasu, H. Oliveira, J. Rocha and L. D. Carlos, *J. Rare Earths*, 2020, **38**, 483–491.
  24. A. A. Kalinichev, M. A. Kurochkin, E. V. Golyeva, A. V. Kurochkin, E. Lähderanta, M. D. Mikhailov and I. E. Kolesnikov, *J. Lumin.*, 2018, **195**, 61–66.
  25. D. Wawrzynczyk, A. Bednarkiewicz, M. Nyk, W. Strek and M. Samoc, *Nanoscale*, 2012, **4**, 6959–6961.
  26. D. Stefańska, B. Bondzior, T. H. Q. Vu, N. Miniajluk-Gaweł and P. J. Dereń, *J. Alloys Compd.*, 2020, **842**, 155742.
  27. M. Sójka, J. F. C. B. Ramalho, C. D. S. Brites, K. Fiaczyk, L. D. Carlos and E. Zych, *Adv. Opt. Mater.*, 2019, **7**, 1901102.
  28. D. Stefańska, M. Stefanski and P. J. Dereń, *J. Alloys Compd.*, 2021, **863**, 158770.
  29. J. Trojan-Piegza, C. D. S. Brites, J. F. C. B. Ramalho, Z. Wang, G. Zhou, S. Wang, L. D. Carlos and E. Zych, *J. Mater. Chem. C*, 2020, **8**, 7005–7011.
  30. D. Stefańska and P. J. Dereń, *Adv. Opt. Mater.*, 2020, **18**, 2001143.

**Table S2.** Experimental detailsFor all structures: C<sub>16</sub>H<sub>16</sub>CdN<sub>10</sub>, *M<sub>r</sub>* = 460.79.

|                                                                                                                | Phase I                                                                                                                                                                                                                | Phase II                                             |
|----------------------------------------------------------------------------------------------------------------|------------------------------------------------------------------------------------------------------------------------------------------------------------------------------------------------------------------------|------------------------------------------------------|
| <b>Crystal data</b>                                                                                            |                                                                                                                                                                                                                        |                                                      |
| Crystal system, space group                                                                                    | Orthorhombic, <i>Cmc</i> 2 <sub>1</sub>                                                                                                                                                                                | Monoclinic, <i>P</i> 2 <sub>1</sub>                  |
| Temperature (K)                                                                                                | 295                                                                                                                                                                                                                    | 120                                                  |
| <i>a</i> , <i>b</i> , <i>c</i> (Å)                                                                             | 9.9628 (5), 14.1773 (6), 14.0487 (4)                                                                                                                                                                                   | 8.1130 (6), 14.0621 (6), 8.9405 (3)                  |
| $\alpha$ , $\beta$ , $\gamma$ (°)                                                                              | 90, 90, 90                                                                                                                                                                                                             | 90, 110.376 (4), 90                                  |
| <i>V</i> (Å <sup>3</sup> )                                                                                     | 1984.32 (14)                                                                                                                                                                                                           | 956.16 (9)                                           |
| <i>Z</i>                                                                                                       | 4                                                                                                                                                                                                                      | 2                                                    |
| $\mu$ (mm <sup>-1</sup> )                                                                                      | 1.12                                                                                                                                                                                                                   | 1.17                                                 |
| Crystal size (mm)                                                                                              | 0.19 × 0.15 × 0.10                                                                                                                                                                                                     | 0.19 × 0.15 × 0.10                                   |
| <b>Data collection</b>                                                                                         |                                                                                                                                                                                                                        |                                                      |
| <i>T</i> <sub>min</sub> , <i>T</i> <sub>max</sub>                                                              | 0.871, 1.000                                                                                                                                                                                                           | 0.993, 1.000                                         |
| No. of measured, independent and observed [ <i>I</i> > 2σ( <i>I</i> )] reflections                             | 14992, 2688, 2034                                                                                                                                                                                                      | 8299, 8299, 7517                                     |
| <i>R</i> <sub>int</sub>                                                                                        | 0.022                                                                                                                                                                                                                  | 0.035                                                |
| (sin θ/λ) <sub>max</sub> (Å <sup>-1</sup> )                                                                    | 0.692                                                                                                                                                                                                                  | 0.823                                                |
| <b>Refinement</b>                                                                                              |                                                                                                                                                                                                                        |                                                      |
| <i>R</i> [ <i>F</i> <sup>2</sup> > 2σ( <i>F</i> <sup>2</sup> )], <i>wR</i> ( <i>F</i> <sup>2</sup> ), <i>S</i> | 0.027, 0.058, 1.02                                                                                                                                                                                                     | 0.053, 0.153, 1.08                                   |
| No. of reflections                                                                                             | 2688                                                                                                                                                                                                                   | 8299                                                 |
| No. of parameters                                                                                              | 155                                                                                                                                                                                                                    | 247                                                  |
| No. of restraints                                                                                              | 8                                                                                                                                                                                                                      | 9                                                    |
| H-atom treatment                                                                                               | H-atom parameters constrained                                                                                                                                                                                          | H-atom parameters constrained                        |
| Δ <sub>max</sub> , Δ <sub>min</sub> (e Å <sup>-3</sup> )                                                       | 0.14, -0.26                                                                                                                                                                                                            | 1.38, -2.27                                          |
| Absolute structure                                                                                             | Flack <i>x</i> determined using 806 quotients [( <i>I</i> <sup>+</sup> )-( <i>I</i> <sup>-</sup> )]/[( <i>I</i> <sup>+</sup> )+( <i>I</i> <sup>-</sup> )] (Parsons, Flack and Wagner, Acta Cryst. B69 (2013) 249-259). | Refinement based on two twin components with hklf 5. |
| Absolute structure parameter                                                                                   | -0.033 (11)                                                                                                                                                                                                            | -                                                    |

Computer programs: *CrysAlis PRO* 1.171.38.41 (Rigaku OD, 2015), *CrysAlis PRO* 1.171.38.46 (Rigaku OD, 2015), *SHELXT* 2014/5 (Sheldrick, 2014), *SHELXL2018/3* (Sheldrick, 2018).

**Table S3.** Selected geometric parameters (Å, °)

---

| <b>295 K</b>                           |             |                                         |             |
|----------------------------------------|-------------|-----------------------------------------|-------------|
| Cd1—N4                                 | 2.305 (4)   | Cd1—N1                                  | 2.332 (6)   |
| Cd1—N4 <sup>i</sup>                    | 2.305 (4)   | Cd1—N6 <sup>iii</sup>                   | 2.341 (4)   |
| Cd1—N3 <sup>ii</sup>                   | 2.328 (5)   | Cd1—N6 <sup>iv</sup>                    | 2.341 (4)   |
|                                        |             |                                         |             |
| N4—Cd1—N4 <sup>i</sup>                 | 87.5 (2)    | N3 <sup>ii</sup> —Cd1—N6 <sup>iii</sup> | 89.35 (13)  |
| N4—Cd1—N3 <sup>ii</sup>                | 88.40 (13)  | N1—Cd1—N6 <sup>iii</sup>                | 82.1 (3)    |
| N4 <sup>i</sup> —Cd1—N3 <sup>ii</sup>  | 88.40 (13)  | N4—Cd1—N6 <sup>iv</sup>                 | 91.81 (14)  |
| N4—Cd1—N1                              | 100.1 (2)   | N4 <sup>i</sup> —Cd1—N6 <sup>iv</sup>   | 177.67 (13) |
| N4 <sup>i</sup> —Cd1—N1                | 89.5 (3)    | N3 <sup>ii</sup> —Cd1—N6 <sup>iv</sup>  | 89.35 (12)  |
| N3 <sup>ii</sup> —Cd1—N1               | 171.1 (3)   | N1—Cd1—N6 <sup>iv</sup>                 | 92.8 (3)    |
| N4—Cd1—N6 <sup>iii</sup>               | 177.67 (13) | N6 <sup>iii</sup> —Cd1—N6 <sup>iv</sup> | 88.8 (2)    |
| N4 <sup>i</sup> —Cd1—N6 <sup>iii</sup> | 91.81 (15)  |                                         |             |
|                                        |             |                                         |             |
| <b>120 K</b>                           |             |                                         |             |
| Cd1—N1                                 | 2.279 (8)   | Cd1—N6 <sup>vi</sup>                    | 2.611 (9)   |
| Cd1—N3 <sup>v</sup>                    | 2.202 (8)   | Cd1—N7                                  | 2.221 (8)   |
| Cd1—N4                                 | 2.662 (10)  | Cd1—N9 <sup>v</sup>                     | 2.218 (8)   |
|                                        |             |                                         |             |
| N1—Cd1—N4                              | 79.1 (3)    | N7—Cd1—N1                               | 73.0 (3)    |
| N1—Cd1—N6 <sup>vi</sup>                | 97.6 (3)    | N7—Cd1—N4                               | 84.2 (3)    |
| N3 <sup>v</sup> —Cd1—N1                | 175.0 (3)   | N7—Cd1—N6 <sup>vi</sup>                 | 94.5 (3)    |
| N3 <sup>v</sup> —Cd1—N4                | 96.8 (3)    | N9 <sup>v</sup> —Cd1—N1                 | 109.3 (3)   |
| N3 <sup>v</sup> —Cd1—N6 <sup>vi</sup>  | 86.4 (3)    | N9 <sup>v</sup> —Cd1—N4                 | 94.5 (3)    |
| N3 <sup>v</sup> —Cd1—N7                | 103.9 (3)   | N9 <sup>v</sup> —Cd1—N6 <sup>vi</sup>   | 86.9 (3)    |
| N3 <sup>v</sup> —Cd1—N9 <sup>v</sup>   | 73.8 (3)    | N9 <sup>v</sup> —Cd1—N7                 | 177.2 (3)   |
| N6 <sup>vi</sup> —Cd1—N4               | 176.7 (3)   |                                         |             |

---

Symmetry code(s): (i)  $-x+1, y, z$ ; (ii)  $-x+1, -y+1, z-1/2$ ; (iii)  $-x+1, -y+1, z+1/2$ ; (iv)  $x, -y+1, z+1/2$ ; (v)  $-x, y-1/2, -z+1$ ; (vi)  $-x, y+1/2, -z+1$ .

**Table S4.** Selected hydrogen-bond parameters at 120 K with atom numbering, below.

| $D-H\cdots A$                         | $D-H$ (Å) | $H\cdots A$ (Å) | $D\cdots A$ (Å) | $D-H\cdots A$ (°) |
|---------------------------------------|-----------|-----------------|-----------------|-------------------|
| C5—H5A $\cdots$ N4 <sup>iv</sup>      | 0.97      | 2.19            | 2.927 (12)      | 135.7             |
| C7—H7A $\cdots$ N1                    | 0.97      | 2.09            | 3.063 (12)      | 177.1             |
| C7—H7B $\cdots$ N7 <sup>i</sup>       | 0.97      | 2.45            | 3.402 (12)      | 167.6             |
| C8—H8A $\cdots$ N3 <sup>ii</sup>      | 0.96      | 2.43            | 2.901 (12)      | 110.3             |
| C8—H8C $\cdots$ N9 <sup>iii</sup>     | 0.96      | 2.02            | 2.890 (12)      | 150.1             |
| C9—H9A $\cdots$ N6 <sup>iv</sup>      | 0.96      | 2.19            | 3.040 (12)      | 147.3             |
| C10—<br>H10A $\cdots$ N6 <sup>v</sup> | 0.96      | 2.34            | 3.210 (12)      | 150.3             |

Symmetry code(s): (i)  $x+1, y, z$ ; (ii)  $-x+1, y-1/2, -z+1$ ; (iii)  $-x, y-1/2, -z+1$ ; (iv)  $-x+1, y+1/2, -z+1$ ; (v)  $-x, y+1/2, -z+1$ .

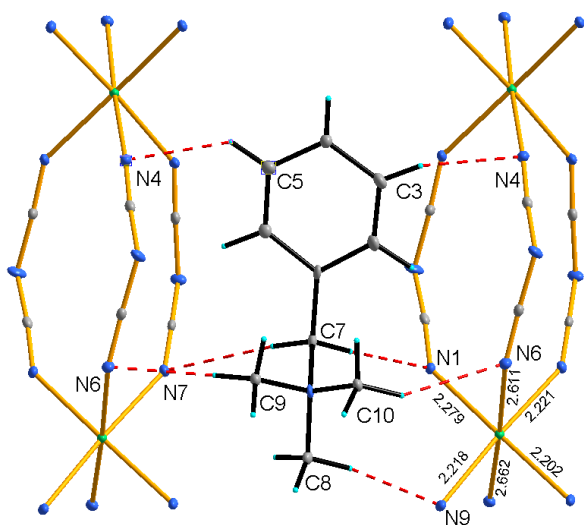

**Table S5.** Raman wavenumbers (in cm<sup>-1</sup>) of BeTriMeCd at 80, 270, 380 K (heating) and 80 K (cooling back).a Bold numbers correspond to the RT Raman bands observed in the spectra measured using the eclipse filter.

| 80 K              | 270 K       | 380 K  | 80 K- cooling back | Assignment                                                      |
|-------------------|-------------|--------|--------------------|-----------------------------------------------------------------|
| 3068sh+3063m      | 3071m+3065m | 3070m  | 3067m              | vCH                                                             |
|                   |             |        | 3047vw             | vCH                                                             |
| 3049w+3044sh      | 3050w+3040m | 3036m  | 3035sh+3032m       | v <sub>as</sub> CH <sub>3</sub>                                 |
| +3040m            | 3030m+3021w | 3030m  | 3025m              | v <sub>as</sub> CH <sub>3</sub>                                 |
| +3024m+3019w      |             |        |                    | v <sub>as</sub> CH <sub>3</sub>                                 |
|                   | 3013w+3001m | 2998vw | 3011w+3000w        | v <sub>as</sub> CH <sub>3</sub>                                 |
| 3011w+3003m       | 2979m       | 2977m  | 2984m              | v <sub>s</sub> CH <sub>3</sub> + v <sub>s</sub> CH <sub>2</sub> |
| 2969m+2961w+2954w | 2966m       | 2962w  | 2971w+2961w        | v <sub>s</sub> CH <sub>3</sub>                                  |
| 2924w+2911w       | 2918w+2911w | 2907vw | 2943w              | v <sub>s</sub> CH <sub>3</sub>                                  |
| 2897w             | 2896w       |        | 2919vw+2909w       | overtone                                                        |
| 2239vs            | 2234vs      | 2232s  | 2242vs             | v <sub>s</sub> C≡N                                              |
| 2229w             |             |        | 2237s              | v <sub>s</sub> C≡N                                              |
| 2220w             |             |        | 2213s              | v <sub>s</sub> C≡N                                              |
| 2208w             | 2206vw      |        |                    | v <sub>s</sub> C≡N                                              |
| 2166w+2155w       | 2162w+2152w |        | 2175w              | v <sub>as</sub> C≡N                                             |
| 2147m             |             |        |                    |                                                                 |
| +2140m            | 2142m       | 2150vw | 2163w+2136w        | v <sub>as</sub> C≡N overtone                                    |
| 1603m             | 1615w       |        |                    | vφ                                                              |
| 1585w             | 1602m       | 1602m  | 1603w              | vφ                                                              |
| 1491vw            | 1585w       |        | 1584vw             | δCH                                                             |
| 1479vw+1473vw     | 1488vw      |        |                    | δ <sub>as</sub> CH <sub>3</sub>                                 |
| 1465m             | 1474vw      | 1474vw | 1484w+1475w        | δ <sub>as</sub> CH <sub>3</sub>                                 |
| 1454m+1440w       | 1463m       | 1459w  | 1460w+1453w        | δ <sub>s</sub> CH <sub>3</sub>                                  |
| 1419w             | 1451m+1440w | 1448m  | 1447w+1441w        | δ <sub>s</sub> CH <sub>3</sub>                                  |
| 1380w             | 1418w       | 1417vw |                    | v <sub>as</sub> N-C                                             |
| 1266w             | 1375m       | 1373vw | 1380w              | ρCH <sub>3</sub>                                                |
| 1246w             | 1264w       |        |                    | ρCH <sub>3</sub>                                                |
| 1215m             | 1244w       | 1238vw | 1247w              | vφ-CH <sub>2</sub>                                              |
| 1203w+1186w       | 1213m       | 1215m  | 1217w+1200w        | ρCH <sub>3</sub>                                                |
| 1162w             | 1201w+1185w | 1188vw | 1179w              | δCH                                                             |
| 1123w             | 1162w       | 1160w  | 1156w              | ρCH <sub>3</sub>                                                |
| 1079w             | 1122w       | 1123vw | 1125vw             | δCH                                                             |
| 1059w             | 1079vw      |        | 1089vw             | δCH                                                             |
| 1030w             | 1064vw      |        |                    | vφ                                                              |
| 1003m             | 1030w       | 1032w  | 1029w              | v <sub>s</sub> φ                                                |
| 992w+998w         | 1003m       | 1003m  | 1002m              | γCH                                                             |
| 975w              | 990w        |        | 987w               | vN-CH <sub>3</sub>                                              |
| 936w              | 975w        |        | 980w               | v <sub>s</sub> N-C                                              |
| 926w+923sh        | 934w        | 918w   | 923w               | v <sub>s</sub> N-C                                              |
| 891m              | 921w        |        |                    | vN-CH <sub>3</sub> +ρCH <sub>2</sub> γ                          |
| 848w              | 888m        | 883w   | 896w               | CH                                                              |
| 834m              | 847w        |        |                    | vN-CH <sub>3</sub> +vCH <sub>2</sub> -N                         |
| 822vw             | 834m        | 835m   | 835w               | φδ                                                              |
| 779w              | 818vw       |        | 818vw              | γCH+vN-CH <sub>3</sub>                                          |
| 724m              | 778w        | 777w   | 783w               | γ+φγCH                                                          |
| 702w              | 722m        | 723m   | 730w               | v+φγCH <sub>2</sub> -N                                          |
| 675m+667m         | 702w        | 700w   | 704w               | δ <sub>s</sub> N-C-N                                            |
| 620w              | 675m        | 655m   | 651m               | φδ                                                              |
|                   | 621w        | 621w   | 620w               |                                                                 |



|                   |                  |                   |                   |                                                                                  |
|-------------------|------------------|-------------------|-------------------|----------------------------------------------------------------------------------|
| 608vw             | 609vw            | 611vw             | 612vw             | $\phi\delta$                                                                     |
| 551vw+537w        | 548vw+536w       | 535w              | 561w+543w         | $\gamma_s\text{N-C-N}$                                                           |
| 527w              |                  |                   |                   | $\gamma_{as}\text{N-C-N} + \phi\gamma$                                           |
| 514w              | 513w             | 514vw             | 514w              | $\delta_{as}\text{N-C-N}$                                                        |
| 449w              | 446w             |                   |                   | $\phi\gamma$                                                                     |
| 414w+396w         | 416w+393w        | 420vw             | 423w+390w         | $\phi\gamma$                                                                     |
| 331vw+321w        | 315w             |                   |                   | $\tau\text{CH}_3$                                                                |
| <b>303w+294w</b>  | <b>300w</b>      |                   | <b>301w+288w</b>  | $\tau\text{CH}_3$                                                                |
| <b>275m</b>       | <b>275w</b>      | <b>273w</b>       | <b>277w</b>       | $\phi\rho\text{-CH}_2\text{-N} + \tau\text{CH}_3$                                |
| <b>254w</b>       | <b>244sh</b>     |                   | <b>259w+238w</b>  | $\nu\text{Cd-N}$                                                                 |
| <b>243w+207m</b>  | <b>214m+204m</b> | <b>208sh+178m</b> | <b>194sh+184m</b> | $\nu\text{Cd-N} + \delta_s\text{C-N-C}$                                          |
| <b>186w+167w</b>  |                  |                   | <b>168w</b>       | $\nu\text{Cd-N}$                                                                 |
| <b>154sh+148w</b> | <b>143sh</b>     |                   | <b>155w</b>       | $\omega\text{Cd-N} + \text{T}'(\text{BeTriM})$                                   |
| <b>134m+123w</b>  | <b>130m</b>      | <b>125sh</b>      |                   | $\omega\text{Cd-N} + \text{T}'(\text{BeTriM})$                                   |
| <b>111m+100w</b>  | <b>108m</b>      | <b>107m</b>       | <b>124w+112m</b>  | $\omega\text{Cd-N} + \text{T}'(\text{BeTriM}) + \phi\gamma\text{-CH}_2\text{-N}$ |
| <b>89sh+83w</b>   | <b>75m</b>       | <b>79m</b>        | <b>88m+75m</b>    | $\omega\text{Cd-N} + \phi\gamma\text{-CH}_2\text{-N}$                            |
| <b>57s</b>        | <b>50sh</b>      |                   | <b>67s</b>        | $\text{L}(\text{CdN}_6)$                                                         |
| <b>44s+39s</b>    | <b>40vs</b>      | <b>38s</b>        | <b>57s</b>        | $\text{L}(\text{CdN}_6)$                                                         |
| <b>29s</b>        | <b>30vs</b>      | <b>27s</b>        |                   | $\text{L}(\text{CdN}_6)$                                                         |

<sup>a</sup>Key: s, strong; m, medium; w, weak; vw, very weak; sh, shoulder; b, broad; v,  $\delta$ ,  $\gamma$ ,  $\omega$ ,  $\tau$ ,  $\rho$ , T' and L denotes stretching, in-plane bending, out-of-plane bending, wagging, twisting, rocking, translational and librational, respectively.

**Table S6.** RT IR and THz (bold) wavenumbers (in  $\text{cm}^{-1}$ ) of BeTriMeCd as well as ATR IR wavenumbers of the sample heat-treated at 400 K.<sup>a</sup>

| 300 K      | Heat-treated at 400 K | Assignment                                               |
|------------|-----------------------|----------------------------------------------------------|
| 3564w      | 3595w                 | overtone                                                 |
| 3480vw     | 3568vw                | overtone                                                 |
| 3221w      | 3215w                 | overtone                                                 |
| 3060w      | 3063w + 3051w         | $\nu\text{CH}$                                           |
| 3039w      | 3034w                 | $\nu_{\text{as}}\text{CH}_3$                             |
| 2295s      | 2296s                 | overtone                                                 |
| 2233sh     |                       | $\nu_s\text{C}\equiv\text{N}$                            |
| 2223m      | 2235m                 | $\nu_s\text{C}\equiv\text{N}$                            |
| 2203w      | 2215w                 | $\nu_s\text{C}\equiv\text{N}$                            |
| 2160vs     | 2166sh+2155s+2139s    | $\nu_{\text{as}}\text{C}\equiv\text{N}$                  |
| 1601vw     |                       | $\nu\phi$                                                |
| 1585vw     |                       | $\nu\phi$                                                |
| 1485w      | 1486w                 | $\delta\text{CH}$                                        |
| 1474m      | 1474w                 | $\delta_{\text{as}}\text{CH}_3$                          |
| 1462vw     | 1461vw                | $\delta_{\text{as}}\text{CH}_3$                          |
| 1456w      | 1456w                 | $\delta_s\text{CH}_3$                                    |
| 1419w      | 1417w                 | $\delta_s\text{CH}_3$                                    |
| 1375w      | 1369s                 | $\nu_{\text{as}}\text{N-C}$                              |
| 1353s      | 1359s                 | $\nu_{\text{as}}\text{N-C}$                              |
| 1243w      | 1244w                 | $\rho\text{CH}_3$                                        |
| 1214m      | 1216m                 | $\nu\phi\text{-CH}_2$                                    |
| 1185w      | 1186w                 | $\rho\text{CH}_3$                                        |
| 1123w      | 1125w                 | $\rho\text{CH}_3$                                        |
| 1081w      | 1080w                 | $\nu\rho+\phi\text{CH}_3$                                |
| 1067w      |                       | $\delta\text{CH}$                                        |
| 1030w      | 1034w                 | $\nu\phi$                                                |
| 1004w      | 1003w                 | $\nu_s\phi$                                              |
| 988w       | 987w                  | $\gamma\text{CH}$                                        |
| 974w       | 977w                  | $\nu\text{N-CH}_3$                                       |
| 927w+921w  | 919m                  | $\nu_s\text{N-C}$                                        |
| 888m       | 889m                  | $\nu\text{N-CH}_3+\rho\text{CH}_2$                       |
| 872sh      | 875sh                 | $\gamma\text{CH}$                                        |
| 778w       | 780w                  | $\gamma\text{CH}+\nu\text{N-CH}_3$                       |
| 723m       | 726m                  | $\gamma+\phi\gamma\text{CH}$                             |
| 702m       | 701m                  | $\nu+\phi\gamma\text{CH}_2\text{-N}$                     |
| 671m+666sh | 651m                  | $\delta_s\text{N-C-N}$                                   |
| 610vw      | 613vw                 | $\phi\delta$                                             |
| 530m       | 537sh                 | $\gamma_s\text{N-C-N}$                                   |
| 513w       | 508m                  | $\gamma_{\text{as}}\text{N-C-N} +\phi\gamma$             |
| 454w       | 456w                  | $\phi\gamma$                                             |
| 418vw      |                       | $\phi\gamma$                                             |
| 301vw      |                       | $\tau\text{CH}_3$                                        |
| 291vw      |                       | $\tau\text{CH}_3$                                        |
| 276w       |                       | $\phi\rho\text{-CH}_2\text{-N} +\tau\text{CH}_3$         |
| 239w       |                       | $\nu\text{Cd-N}+\delta_s\text{C-N-C}$                    |
| 188m       |                       | $\nu\text{Cd-N}$                                         |
| 136m       |                       | $\omega\text{Cd-N}+\text{T}'(\text{BeTriMe})$            |
| <b>71w</b> |                       | $\omega\text{Cd-N}+\phi\gamma\text{-CH}_2\text{-N}$      |
| <b>38m</b> |                       | $\text{L}(\text{CdN}_6)+\text{L}(\text{BeTriMe}^+)+\phi$ |
|            |                       | $\gamma\text{-CH}_2\text{-N-CH}_3$                       |

<sup>a</sup>Key: s, strong; m, medium; w, weak; vw, very weak; sh, shoulder; b, broad;  $\nu$ ,  $\delta$ ,  $\gamma$ ,  $\omega$ ,  $\tau$ ,  $\rho$ , T' and L denotes stretching, in-plane bending, out-of-plane bending, wagging, twisting, rocking, translational and librational, respectively.

**Table S7.** Mulliken atomic charges for BeTriMe<sup>+</sup>. C<sub>B</sub> – carbon atoms of the benzene ring, C<sub>B</sub><sup>\*</sup> – carbon atom of the benzene ring bonded to the CH<sub>2</sub> bridge, C<sub>M</sub> – carbon atoms of the methyl CH<sub>3</sub> groups, C<sub>m</sub> – carbon atoms of the methylene CH<sub>2</sub> group.

| No | Symbol                      | Charge    |
|----|-----------------------------|-----------|
| 1  | N                           | -0.334756 |
| 2  | C <sub>B</sub> <sup>*</sup> | -0.006318 |
| 3  | C <sub>B</sub>              | -0.100139 |
| 4  | H                           | 0.076060  |
| 5  | C <sub>M</sub>              | -0.035711 |
| 6  | H                           | 0.110104  |
| 7  | H                           | 0.117230  |
| 8  | H                           | 0.123416  |
| 9  | C <sub>B</sub>              | -0.041859 |
| 10 | H                           | 0.089978  |
| 11 | C <sub>m</sub>              | 0.050514  |
| 12 | H                           | 0.119373  |
| 13 | H                           | 0.119493  |
| 14 | C <sub>B</sub>              | -0.035694 |
| 15 | H                           | 0.093887  |
| 16 | C <sub>B</sub>              | -0.041758 |
| 17 | H                           | 0.089944  |
| 18 | C <sub>M</sub>              | -0.032012 |
| 19 | H                           | 0.115982  |
| 20 | H                           | 0.115971  |
| 21 | H                           | 0.115671  |
| 22 | C <sub>B</sub>              | -0.100444 |
| 23 | H                           | 0.076084  |
| 24 | C <sub>M</sub>              | -0.035791 |
| 25 | H                           | 0.117301  |
| 26 | H                           | 0.110174  |
| 27 | H                           | 0.123297  |

**Table S8.** Changes of CIE chromaticity and emission colour of BeTriMeCd with temperature.

| Temperature (K) | CIE chromaticity of BeTriMeCd |      | Colour of emission |
|-----------------|-------------------------------|------|--------------------|
|                 | x                             | y    |                    |
| 80              | 0.21                          | 0.23 | blue               |
| 90              | 0.22                          | 0.25 | greenish blue      |
| 100             | 0.24                          | 0.26 | greenish blue      |
| 110             | 0.25                          | 0.28 | greenish blue      |
| 120             | 0.26                          | 0.29 | greenish blue      |
| 130             | 0.27                          | 0.31 | bluish green       |
| 140             | 0.29                          | 0.32 | bluish green       |
| 150             | 0.30                          | 0.32 | white              |
| 160             | 0.31                          | 0.33 | white              |
| 170             | 0.31                          | 0.34 | white              |
| 180             | 0.32                          | 0.34 | white              |
| 190             | 0.33                          | 0.34 | white              |
| 200             | 0.34                          | 0.35 | white              |
| 210             | 0.35                          | 0.35 | white              |
| 220             | 0.36                          | 0.36 | white              |
| 230             | 0.37                          | 0.36 | white              |
| 240             | 0.37                          | 0.36 | white              |
| 250             | 0.38                          | 0.36 | white              |
| 260             | 0.38                          | 0.37 | white              |
| 270             | 0.39                          | 0.38 | greenish yellow    |
| 280             | 0.39                          | 0.39 | greenish yellow    |
| 290             | 0.38                          | 0.38 | greenish yellow    |
| 300             | 0.38                          | 0.38 | greenish yellow    |
| 310             | 0.38                          | 0.39 | greenish yellow    |
| 320             | 0.38                          | 0.39 | greenish yellow    |
| 330             | 0.38                          | 0.40 | greenish yellow    |
| 340             | 0.38                          | 0.41 | greenish yellow    |
| 350             | 0.38                          | 0.41 | greenish yellow    |
| 360             | 0.39                          | 0.42 | greenish yellow    |
| 370             | 0.40                          | 0.42 | greenish yellow    |
| 380             | 0.40                          | 0.43 | greenish yellow    |
| 390             | 0.39                          | 0.43 | greenish yellow    |
| 400             | 0.40                          | 0.43 | greenish yellow    |
| 410             | 0.40                          | 0.43 | greenish yellow    |

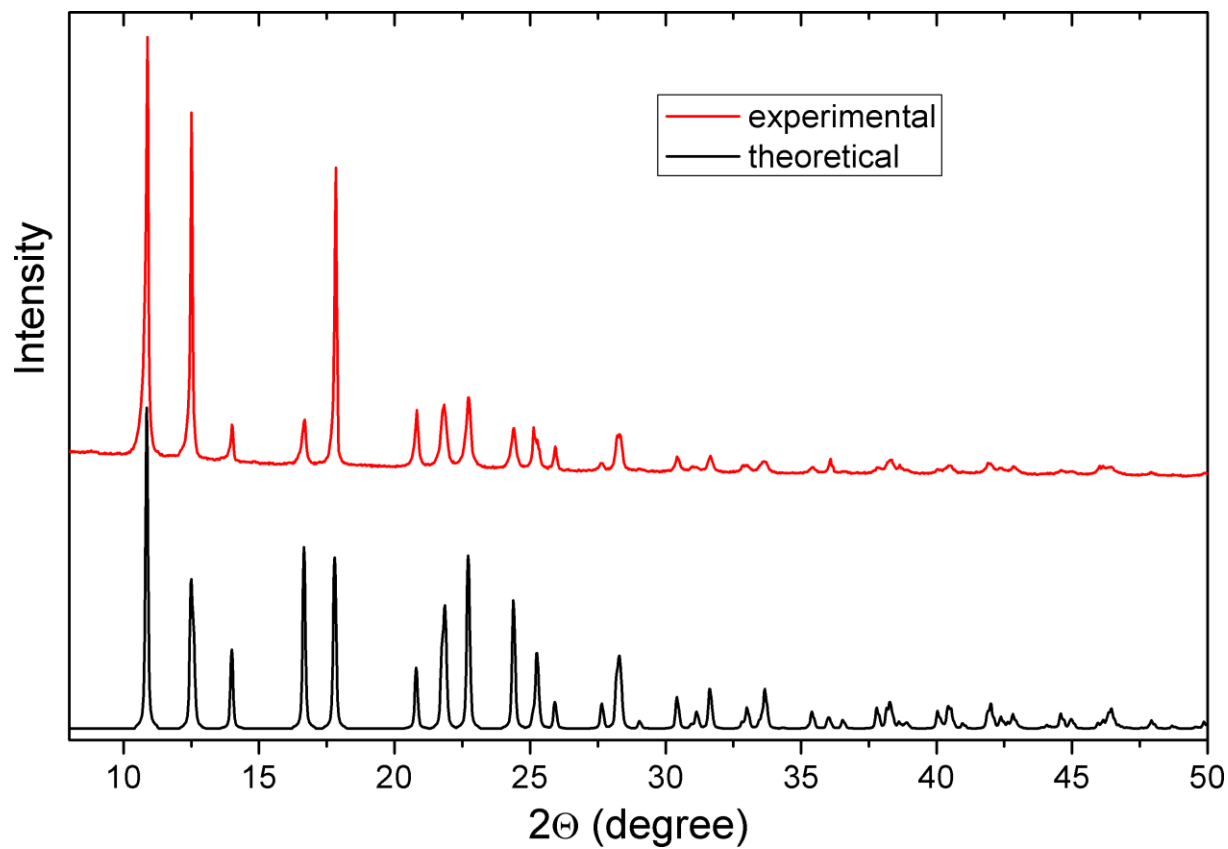

Figure S1. Room-temperature powder XRD pattern for the as-prepared BeTriMeCd together with the calculated one based on the RT single crystal structure.

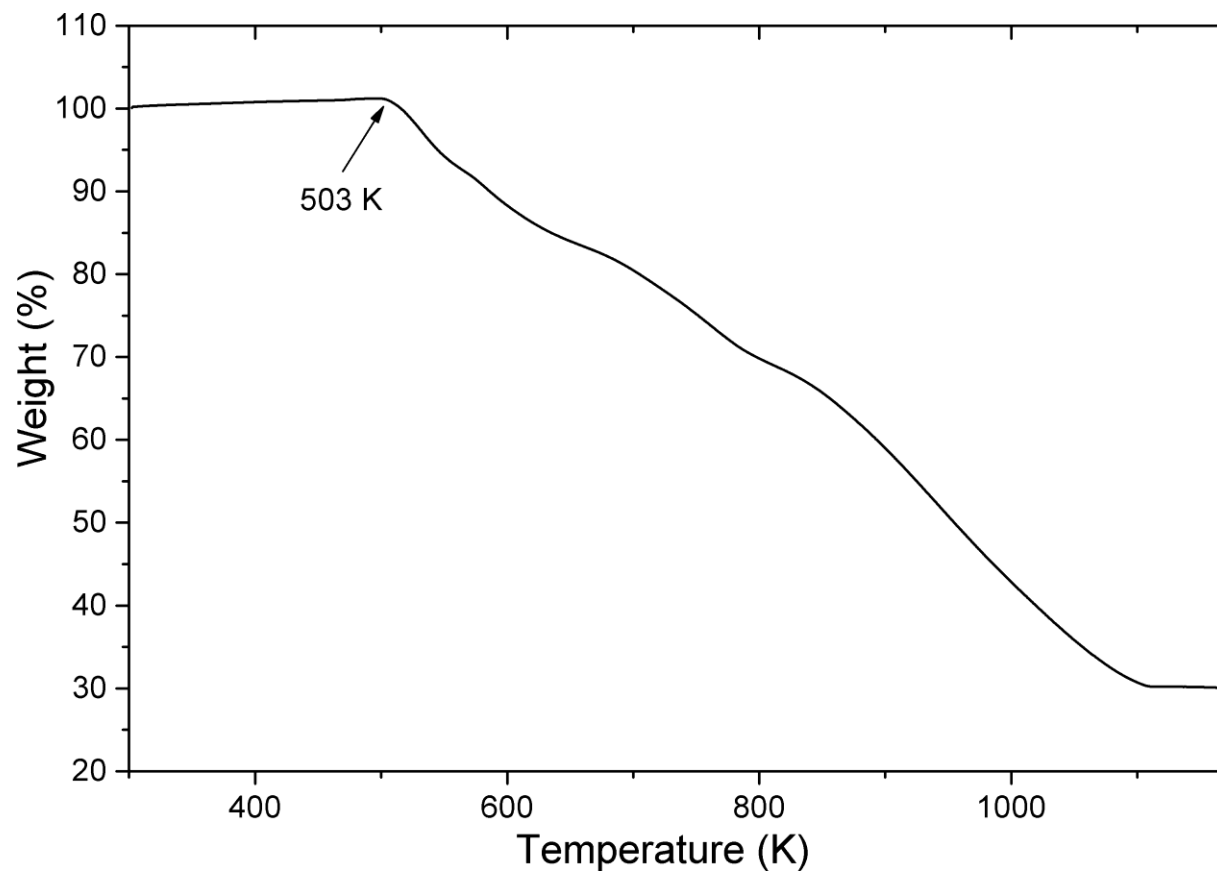

Figure S2. TGA plot of BeTriMeCd.

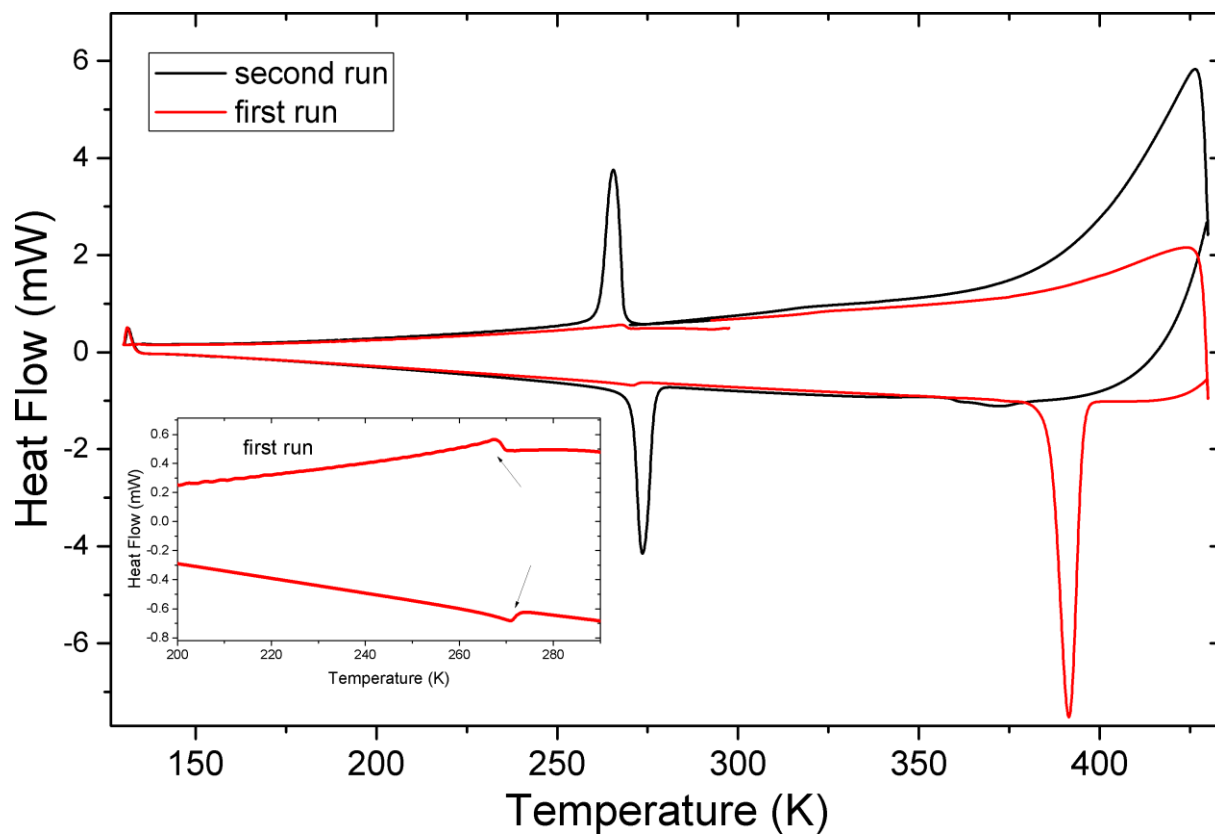

Figure S3. DSC traces for BeTriMeCd: cooling from 298 K to 130 K, heating to 430 K and cooling to 290 K (1<sup>st</sup> run, red line; 2<sup>nd</sup> run, black). Insert shows weak DSC anomalies near 270 K observed during the first run.

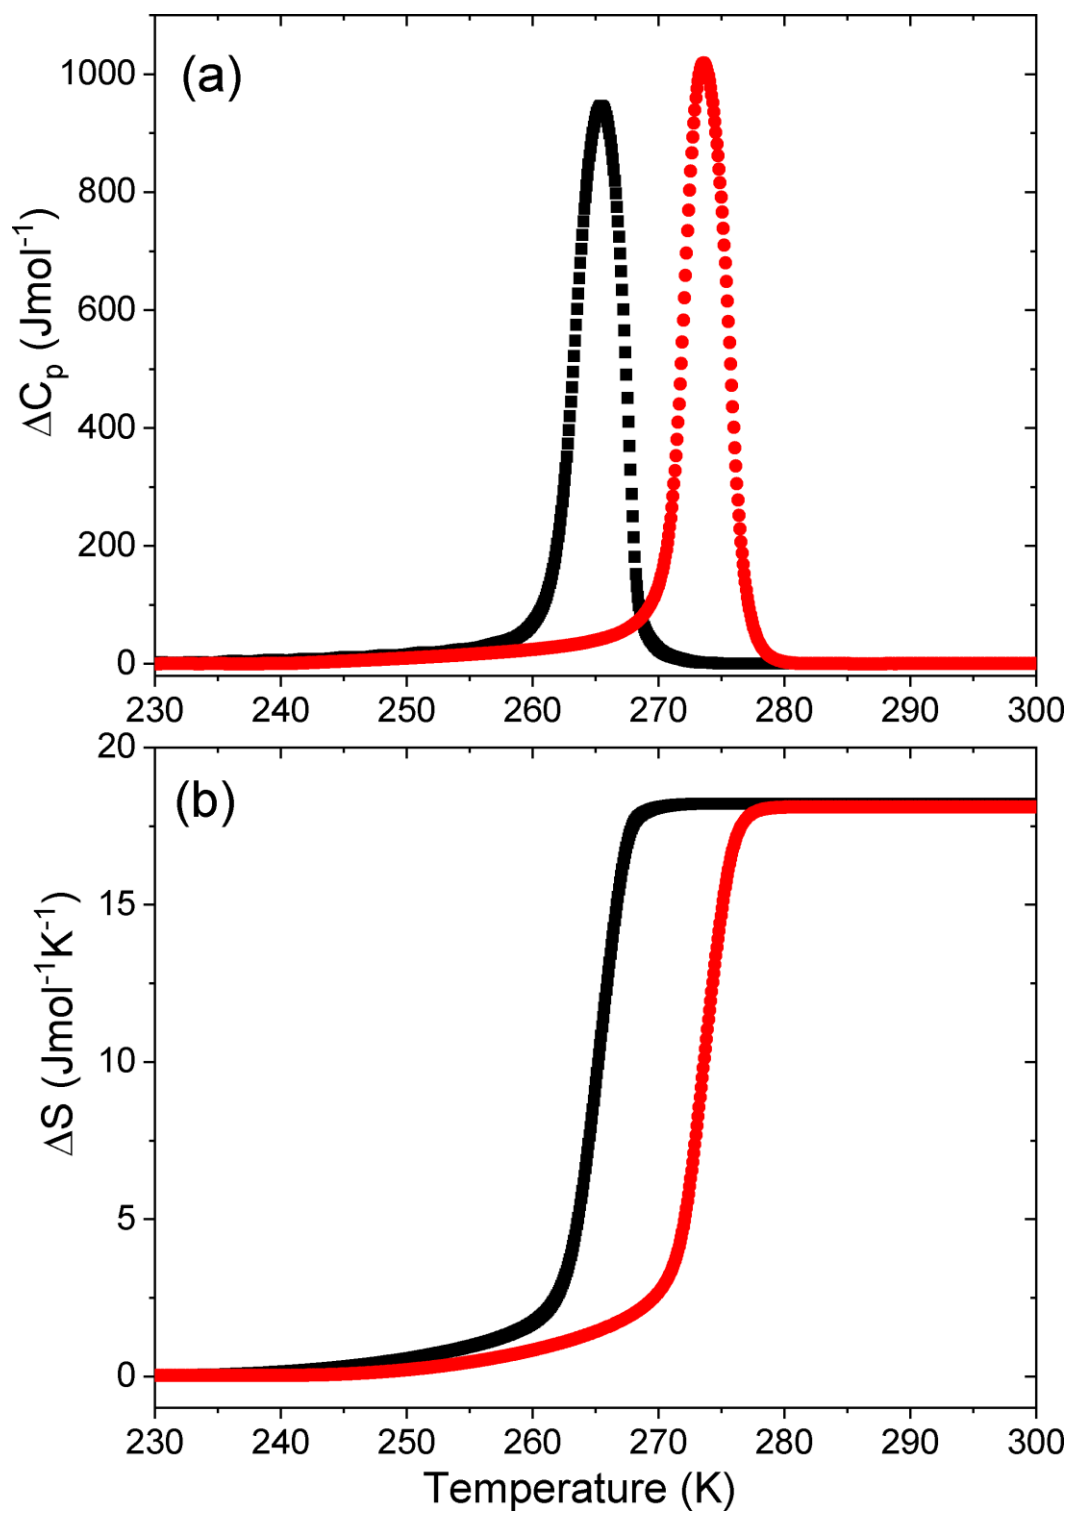

Figure S4. The change in  $C_p$  (a) and  $S$  (b) for BeTriMeCd in 2<sup>nd</sup> run: cooling is denoted by black line and heating by read line.



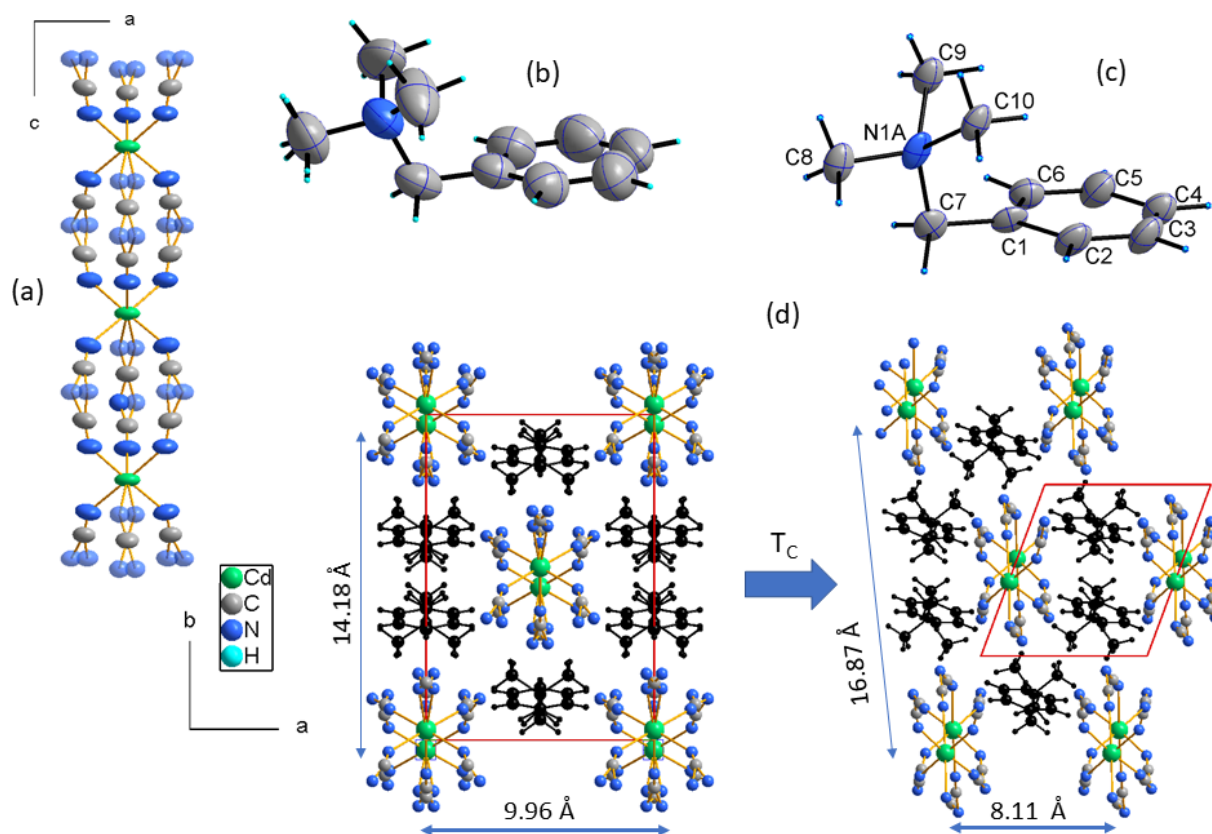

Figure S5. The details of the crystal structure of BeTriMeCd in (a)-(b) Phase **I**, (c) BeTriMe<sup>+</sup> in Phase **II** with atom numbering, the displacement ellipsoids are drawn at 50% probability, (d) distortion of the crystal structure as seen along the polar direction. In **II** radical elongation of the interchain distance in  $b_{ortho}$  occurs, on the other hand, the interchain distances in  $a_{ortho}$  are reduced in a comparable degree.

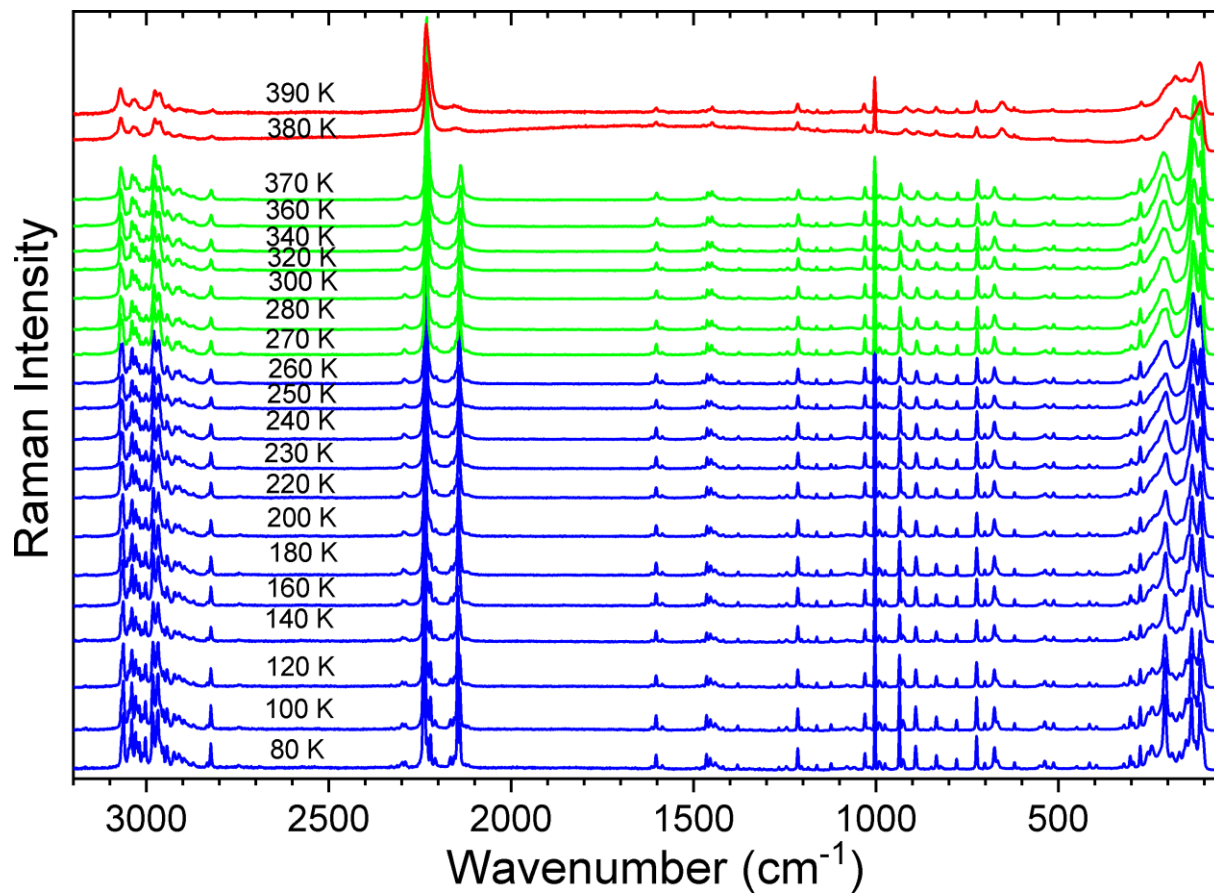

Figure S6. Raman spectra of BeTriMeCd in the heating run from 80 to 390 K (3200-50  $\text{cm}^{-1}$  range).

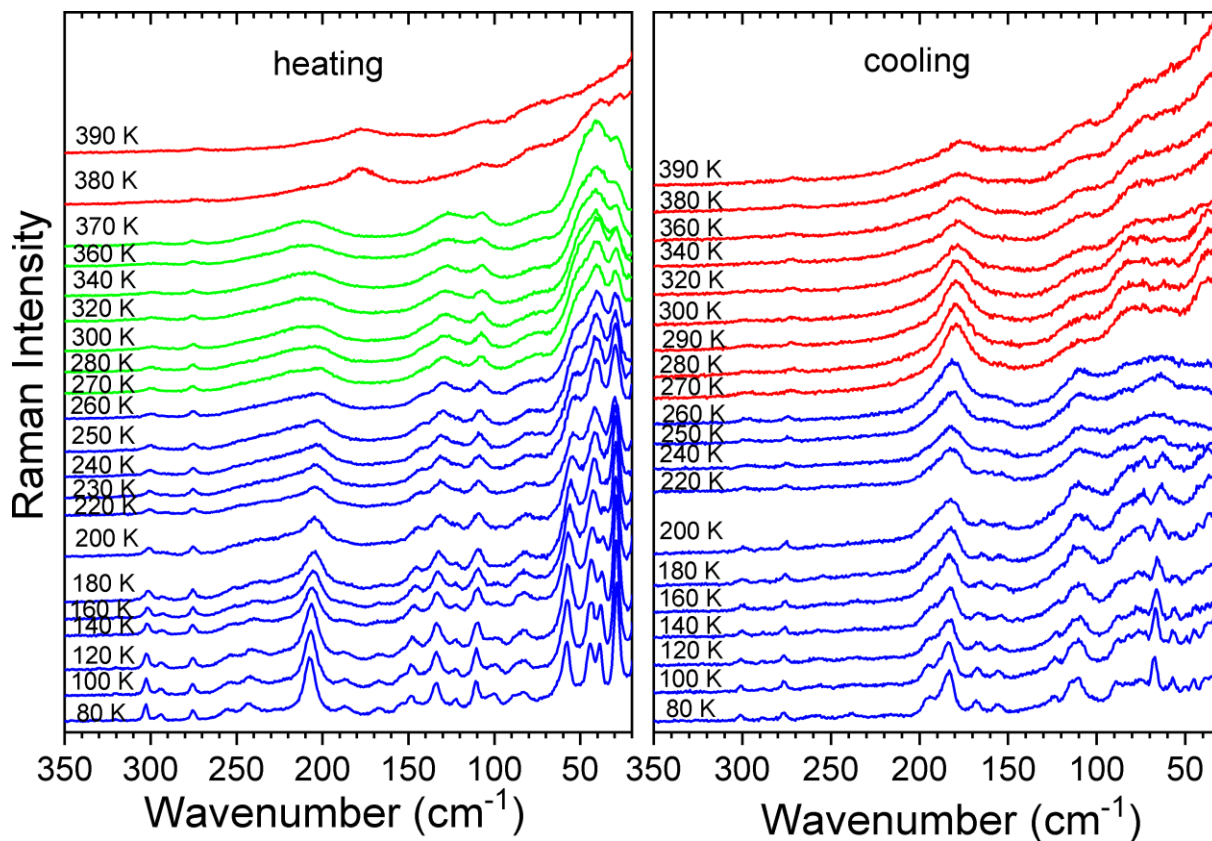

Figure S7. Low-wavenumber Raman spectra of BeTriMeCd measured using the Eclipse filter in the heating (left panel) and cooling (right panel) runs.

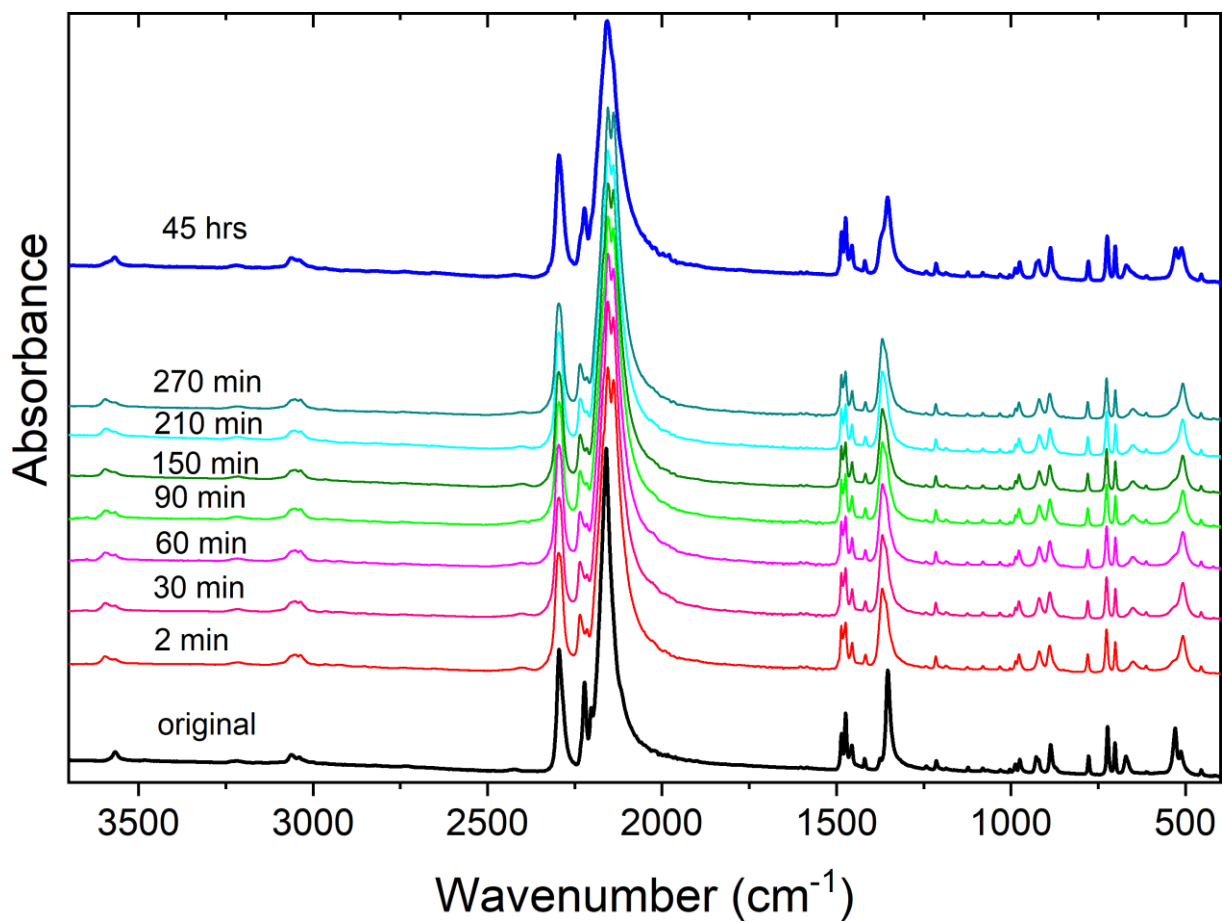

Figure S8. ATR spectra of the original BeTriMeCd sample and the same sample heat-treated at 400 K and kept at room-temperature for 2, 30, 60, 90, 150, 210 and 270 min as well as 45 hours.

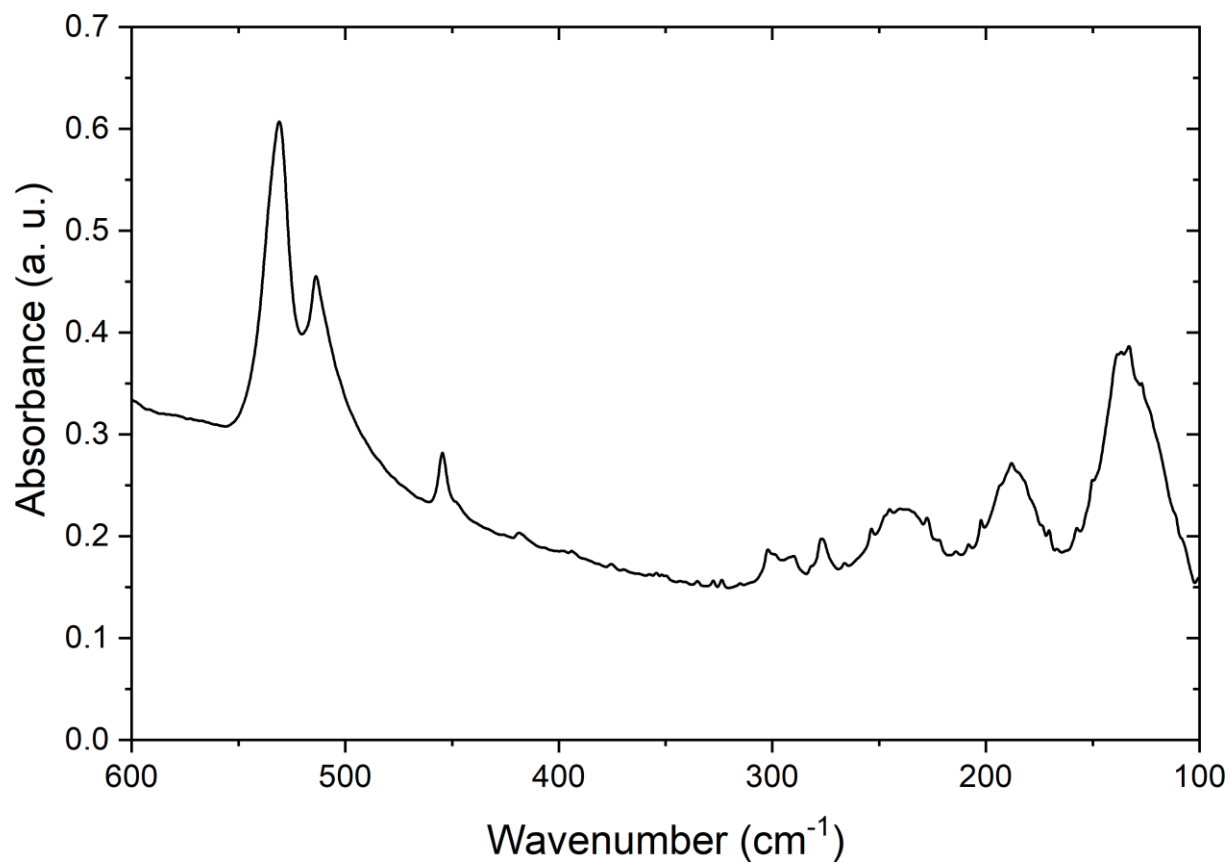

Figure S9. Far-IR spectrum of BeTriMeCd recorded at RT.

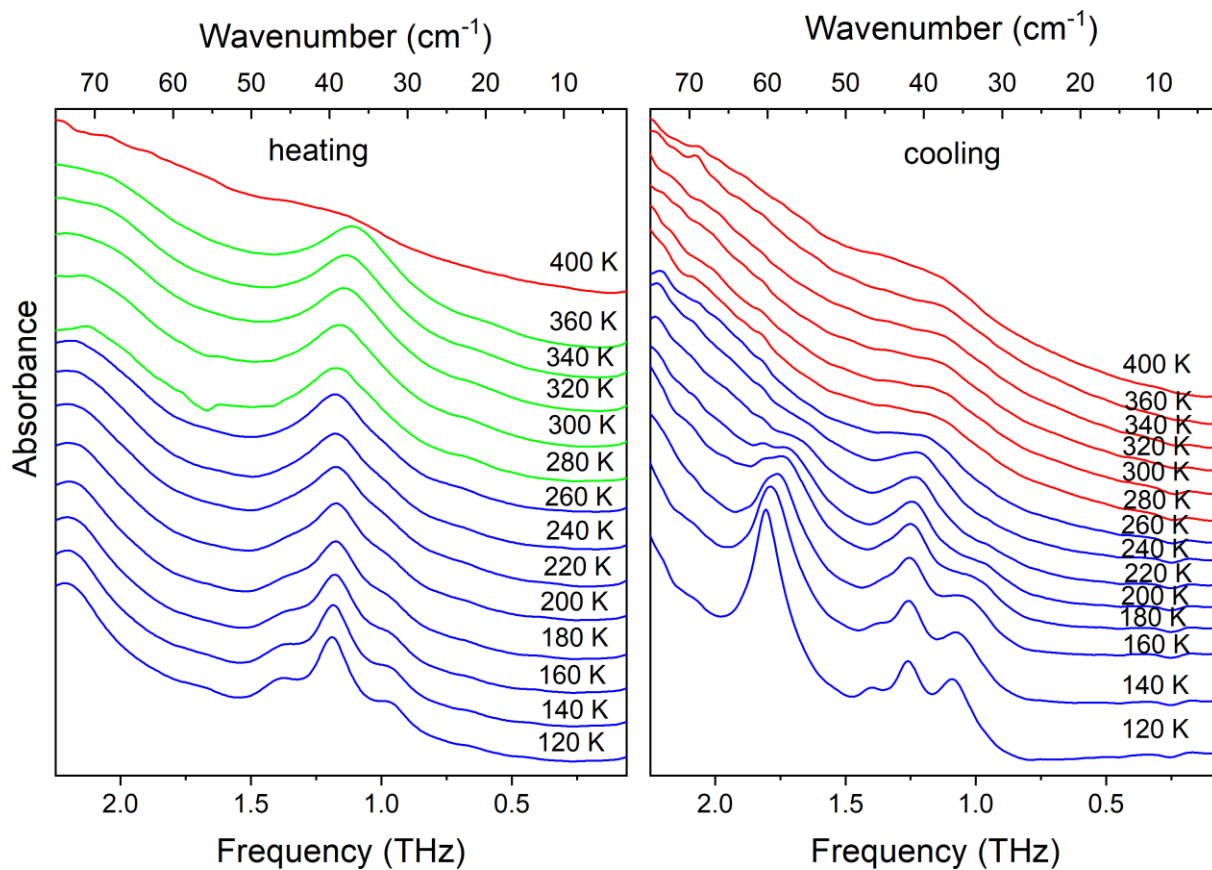

Figure S10. Temperature-dependent THz spectra of BeTriMeCd recorded in the heating and cooling runs.

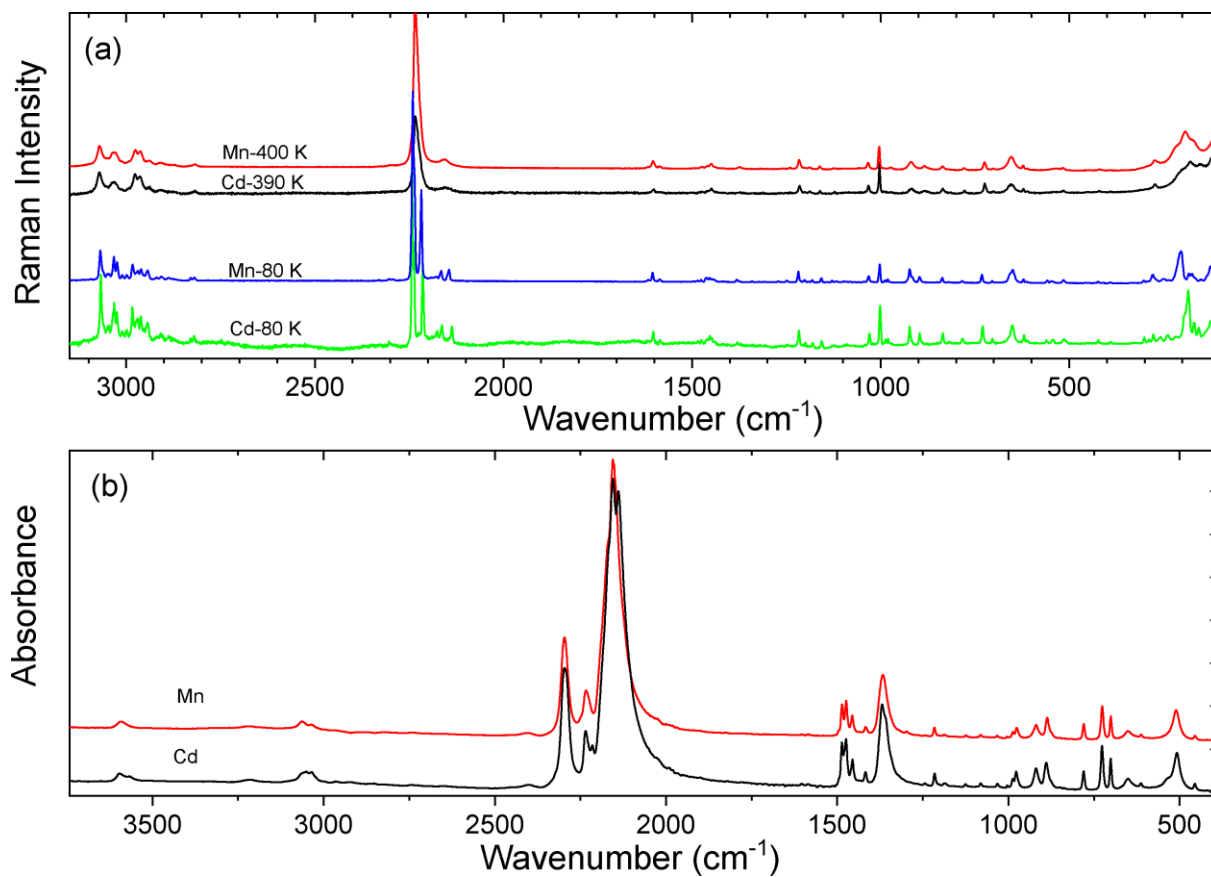

Figure S11. (a) Raman spectra of the BeTriMeCd and BeTriMeMn samples measured at 390 and 400 K, respectively, and the spectra of the same compounds recorded for the heat-treated samples at 80 K. (b) RT ATR IR spectra of the BeTriMeCd and BeTriMeMn samples heat-treated at 400K.

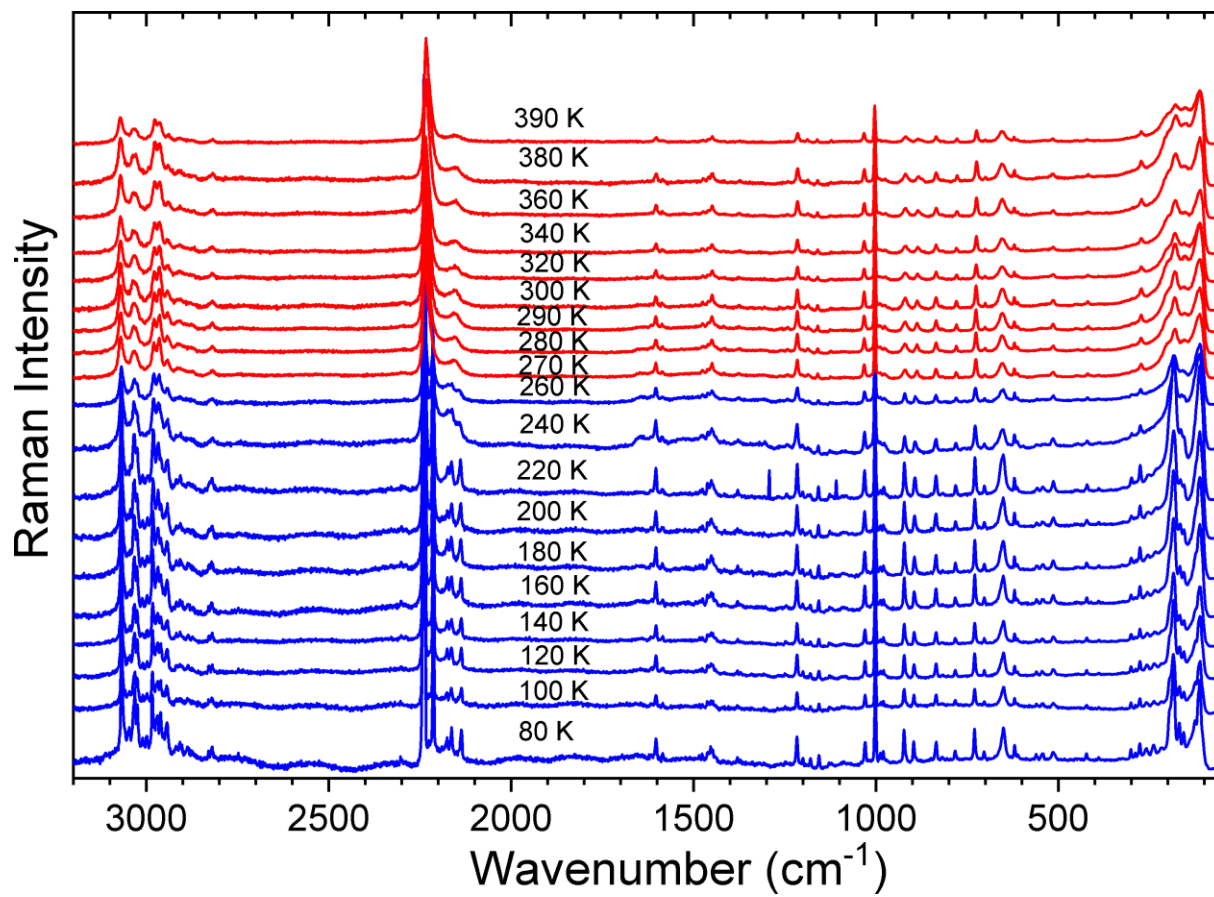

Figure S12. Raman spectra of BeTriMeCd in the cooling run from 390 to 80 K (3200-50  $\text{cm}^{-1}$  range).



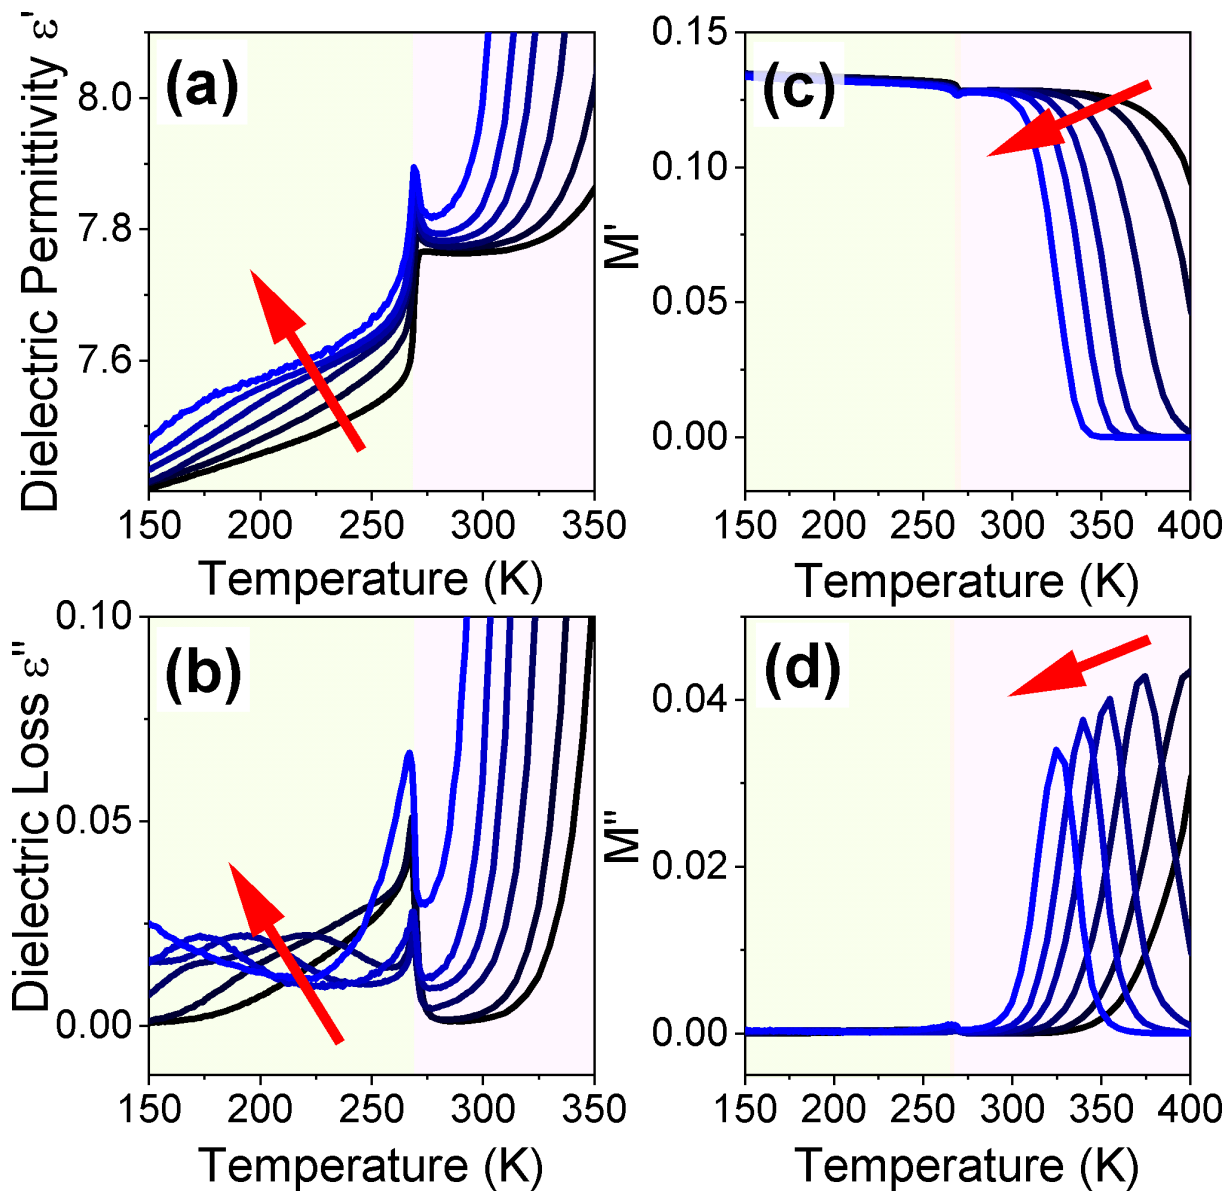

Figure S13. Temperature dependence of the complex dielectric permittivity  $\epsilon'$  (a) dielectric loss  $\epsilon''$ , (b) and electric modulus parts  $M'$  (c),  $M''$  (d) for selected frequencies from the range 10Hz to 1MHz for BeTriMeCd polycrystalline sample. The marked areas indicate the different phases during cooling from 400K.

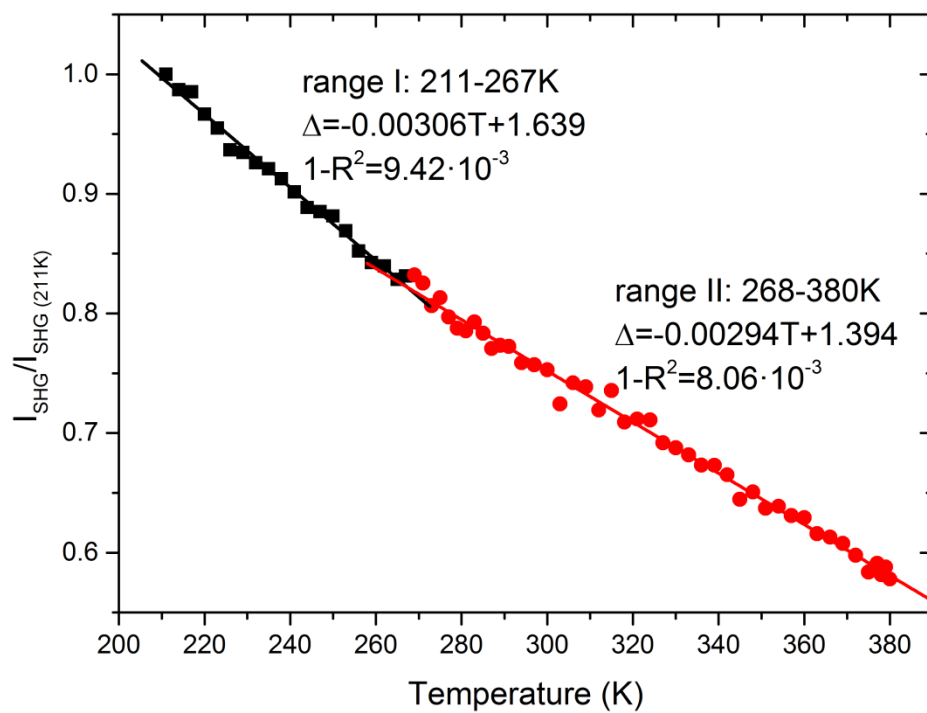

Figure S14. Plot of thermometric parameter  $\Delta$  ( $\Delta = I_{SHG} / I_{SHG}(211K)$ ) in the function of temperature for BeTriMeCd. Linear functions led through two sets of points serve as calibration curves.

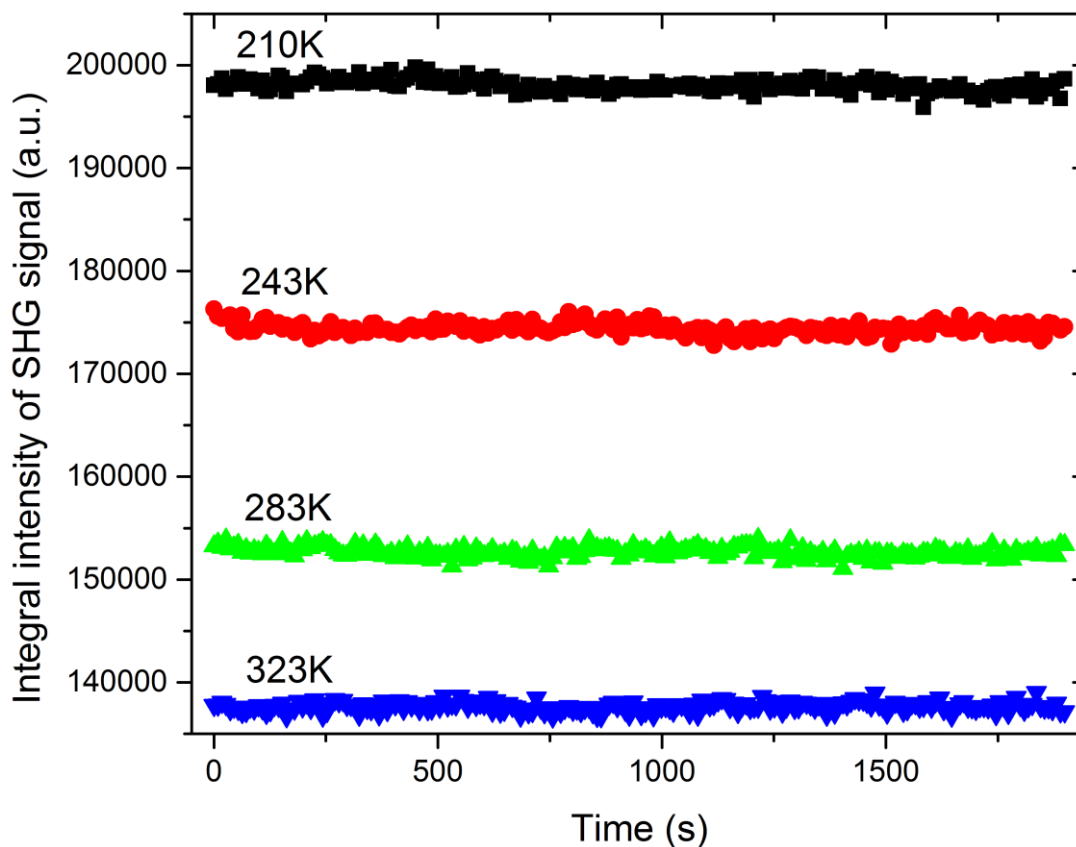

Figure S15. Stability plots of integral intensity of SHG signal in the function of irradiation time for BeTriMeCd registered for four temperature points: 210K, 243K, 283K, and 323K. Each set consists of ca. 220 measurement points which were collected for a period of 30 minutes of laser irradiation. Data shown corresponds is not normalized vs. laser beam intensity, hence the signal ripple is due to minor fluctuation of fundamental beam provided by the femtosecond laser. It is apparent that BeTriMeCd is stable at each of these temperatures for at least 30 minutes of continuous laser irradiation. Laser beam parameters: 800 nm, 75 fs laser pulses at 1kHz repetition rate, 1.3 W/cm<sup>2</sup> power density.

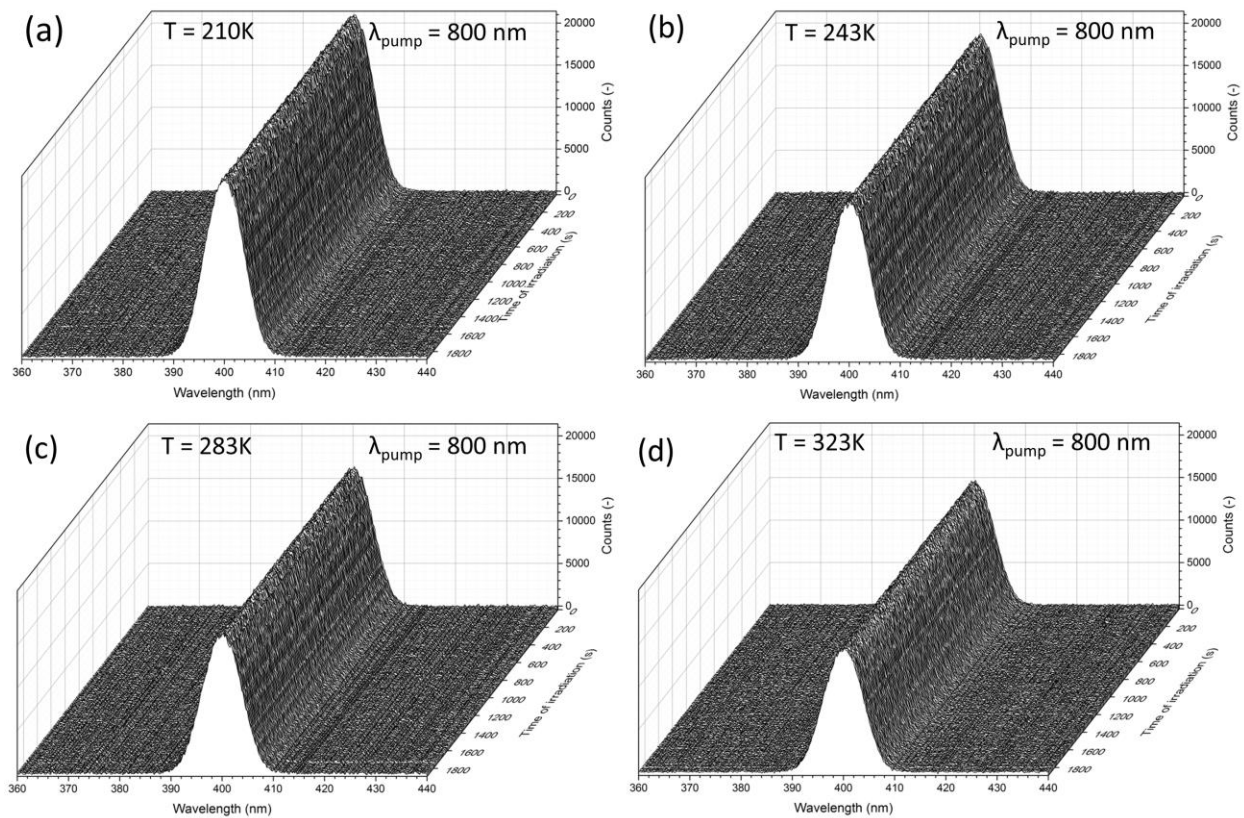

Figure S16. Experimental spectra collected during laser stability experiments at a) 210K, b) 243K, c) 283K, d) 323K.

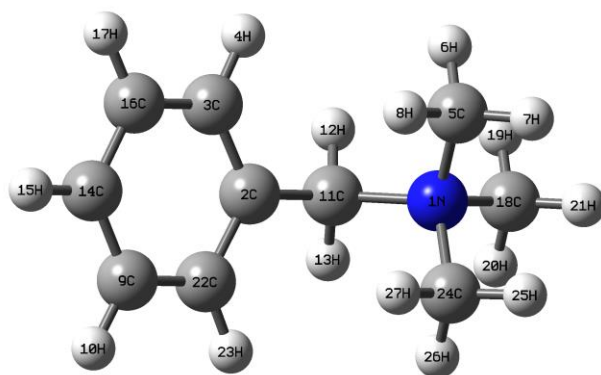

Figure S17. The structural model of the studied  $\text{BeTriMe}^+$  cation.

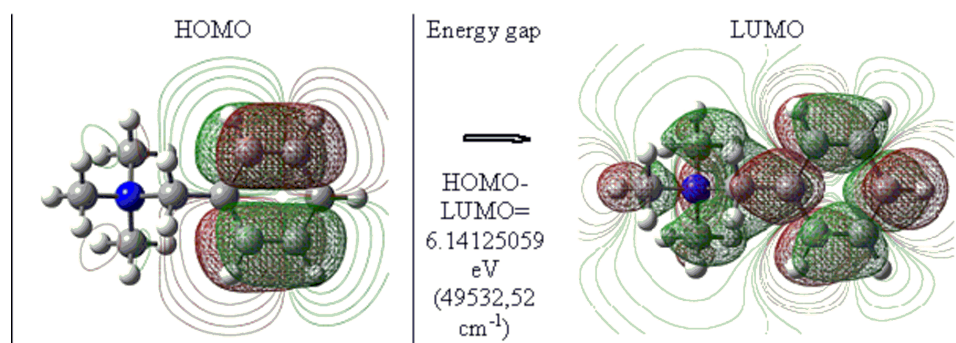

Figure S18. HOMO and LUMO orbitals and the HOMO-LUMO energy gap for the benzyltrimethylamine cation ( $\text{BeTriMe}^+$ ). Detailed values: HOMO(41) = -0,38802 a.u., LUMO(42) = -0,16233 a.u., Energy gap = 0.22569 a.u. (6.14125059 eV, 49532,52  $\text{cm}^{-1}$ ).

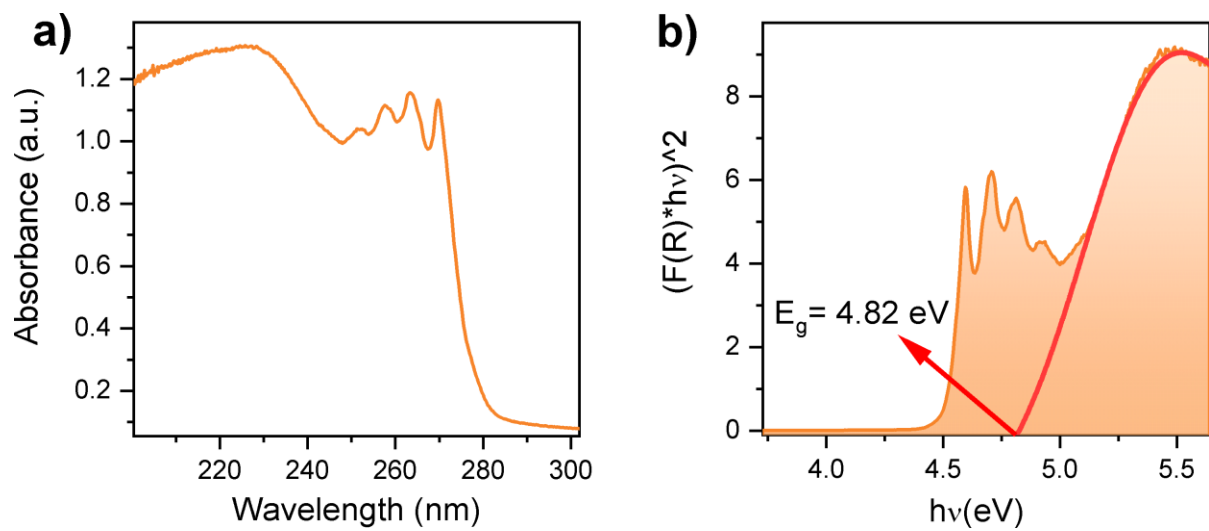

Figure S19. a) The absorbance spectra of BeTriMeCd and b) the energy band gap estimated using Kubelka–Munk function.
